# Supplementary material for: Gas-dependent photoresponse of SnS nanoparticles-based photodetectors
Source: Royal Society of Chemistry journal article supplement (doi:10.1039/c4tc02574a), 2014-12-08
Supplement: c4tc02574a1.pdf [file c4tc02574a1.pdf]

Supplementary Information for:  
**Gas-dependent Photoresponse of SnS Nanoparticles Based  
Photodetectors**

Fangyuan Lu,<sup>a</sup> Juehan Yang,<sup>a</sup> Renxiong Li,<sup>a</sup> Nengjie Huo,<sup>a</sup> Yongtao Li,<sup>a</sup> Zhongming Wei<sup>\*b</sup> and Jingbo Li<sup>\*a</sup>

<sup>a</sup>State Key Laboratory for Superlattices and Microstructures, Institute of Semiconductors, Chinese Academy of Sciences, P. O. Box 912, Beijing 100083, China. E-mail: [jbli@semi.ac.cn](mailto:jbli@semi.ac.cn).

<sup>b</sup>Nano-Science Center & Department of Chemistry, University of Copenhagen, Universitetspatken 5, DK-2100 Copenhagen, Denmark. E-mail: [zmwei@semi.ac.cn](mailto:zmwei@semi.ac.cn).

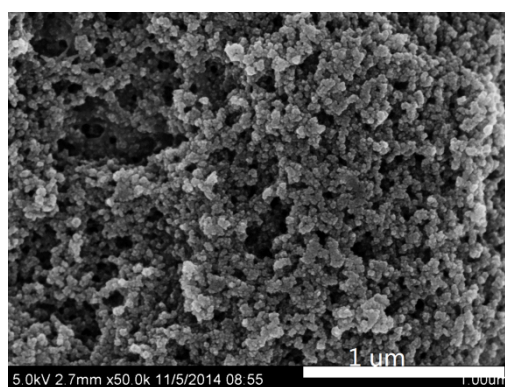

Fig. S1. The SEM images of as-synthesized SnS sample with large scale.

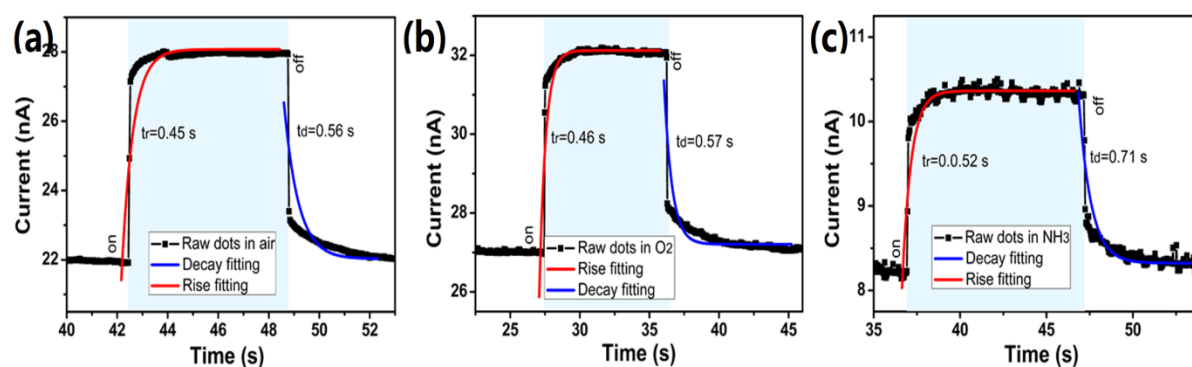

Fig. S2. The dynamic response times of SnS photodetector (a) in air, (b) in O<sub>2</sub> and (c) in NH<sub>3</sub>.

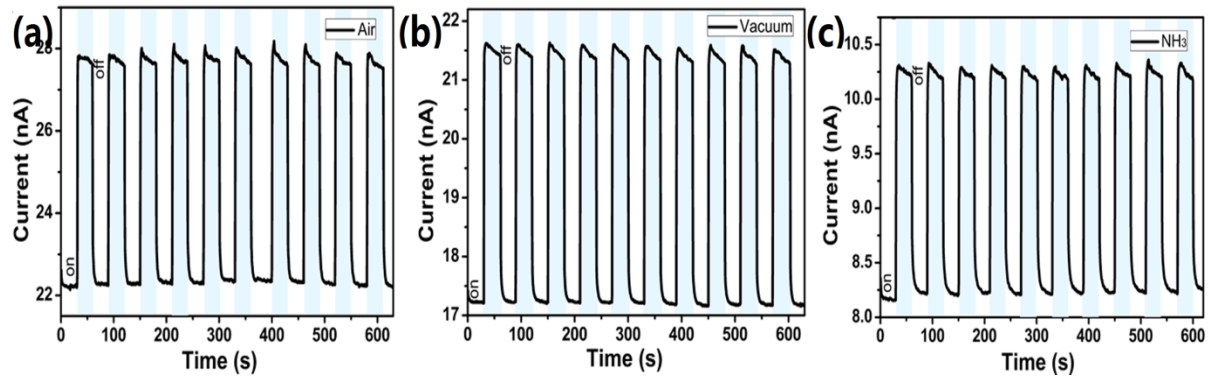

Fig. S3. The stable and repetitive switching characteristics of the SnS photodetector (a) in air, (b) in vacuum and (c) in NH<sub>3</sub>.
